# Supplementary material for: A Near InfraRed Emissive Chemosensor for Zn2+ and Phosphate Derivatives Based on a Di-(2-picolyl)amine-styrylflavylium Push-Pull Fluorophore
Source: MDPI journal article supplement (doi:10.3390/s23010471), 2023-01-01
Supplement: s1 [file s1]

## SUPPORTING INFORMATION

A Near InfraRed emissive chemosensor for  $\text{Zn}^{2+}$  and phosphate derivatives based on a di-(2-picoly)amine-styrylflavylium push-pull fluorophore

Liliana J. Gomes<sup>a</sup>, João P. Carrilho<sup>b</sup>, Pedro M. Pereira<sup>b</sup>, Artur J. Moro\*<sup>a</sup>

<sup>a</sup>*LAQV-REQUIMTE, Departamento de Química, CQFB, Universidade Nova de Lisboa, Monte de Caparica, Portugal.*

<sup>b</sup>*Intracelular Microbial Infection Biology, Instituto de Tecnologia Química e Biológica António Xavier, Universidade Nova de Lisboa, Oeiras, Portugal.*

\* *E-mail: artur.moro@fct.unl.pt*

## NMR spectra

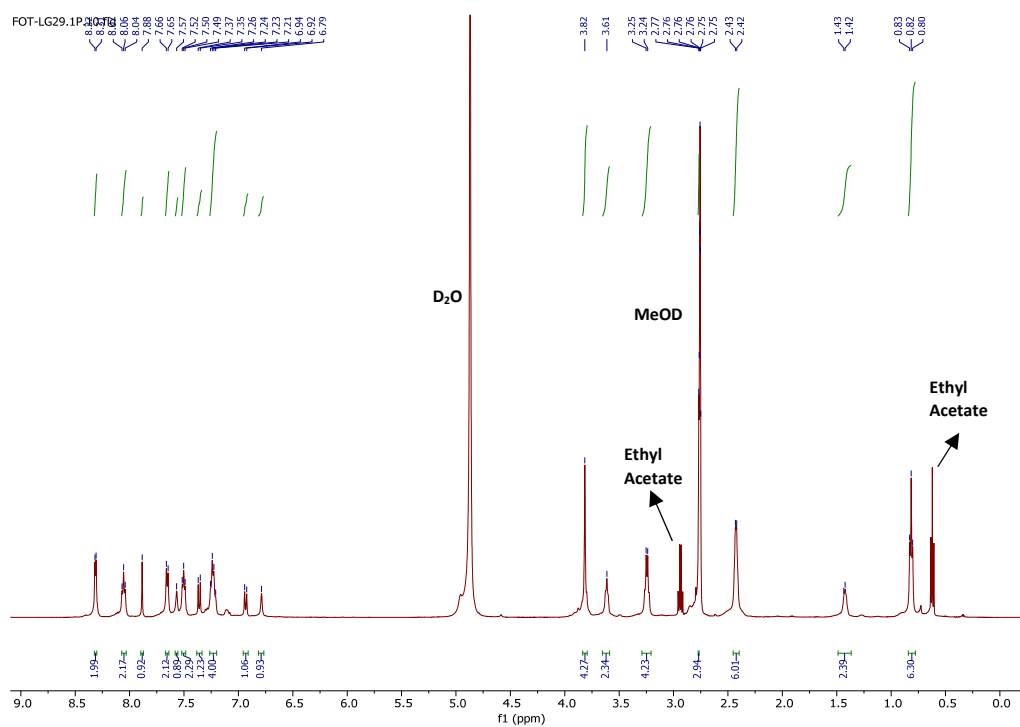

Figure S1.  $^1\text{H}$  NMR spectrum of **1**.

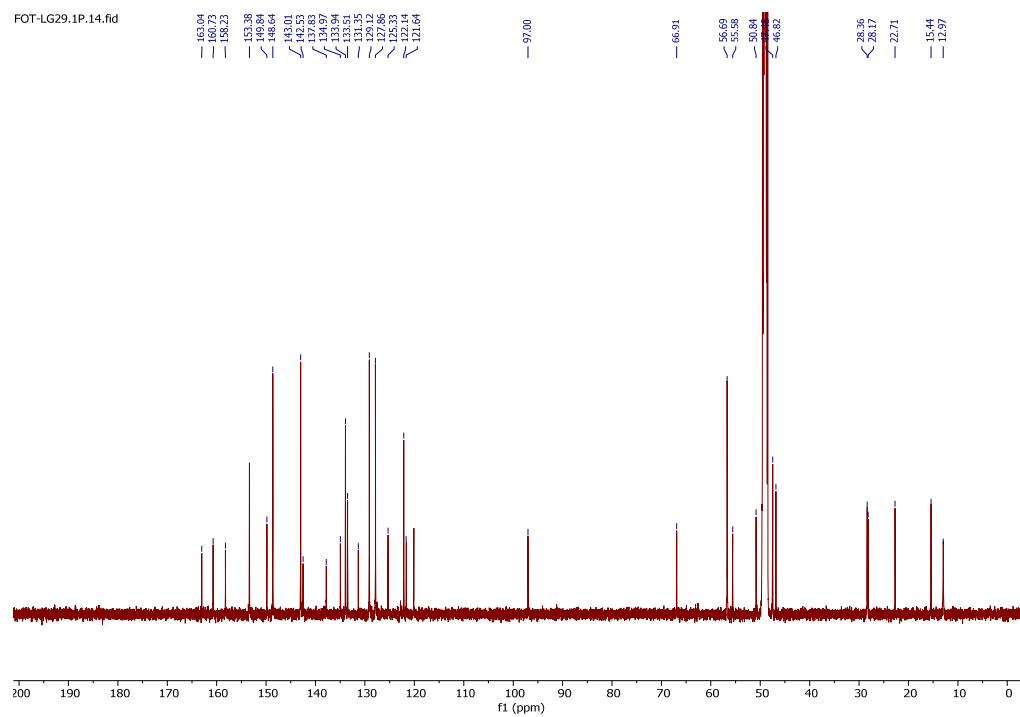

Figure S2.  $^{13}\text{C}$  NMR spectrum of **1**.

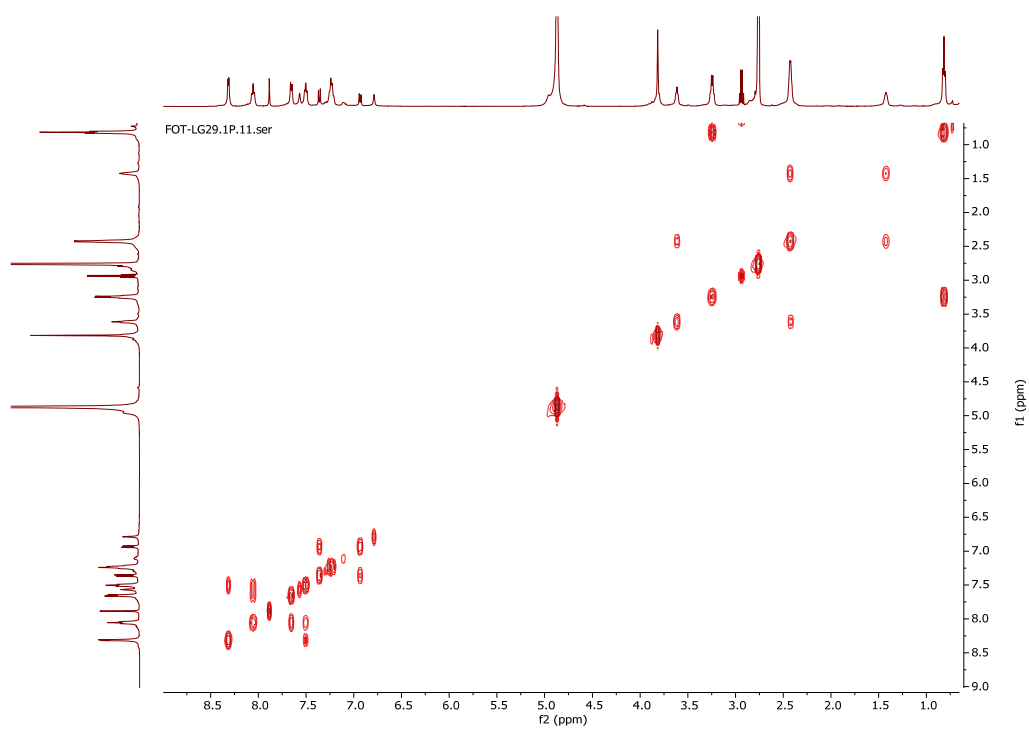

Figure S3.  $^1\text{H}$ - $^1\text{H}$  COSY NMR spectrum of **1**.

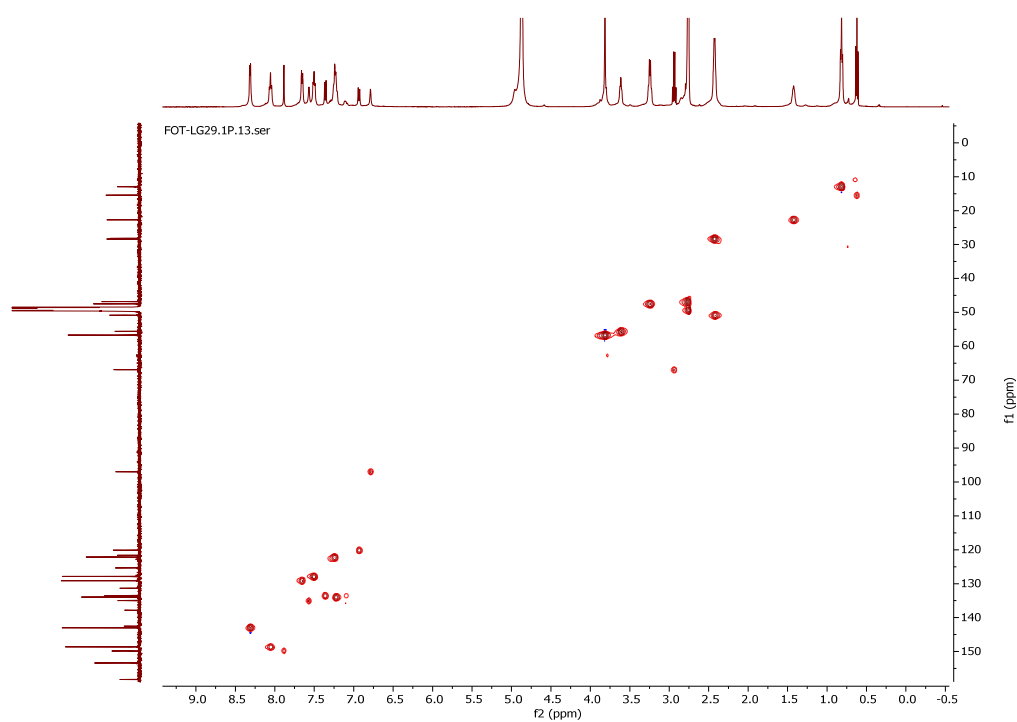

Figure S4.  $^1\text{H}$ - $^{13}\text{C}$  HSQC NMR spectrum of **1**.

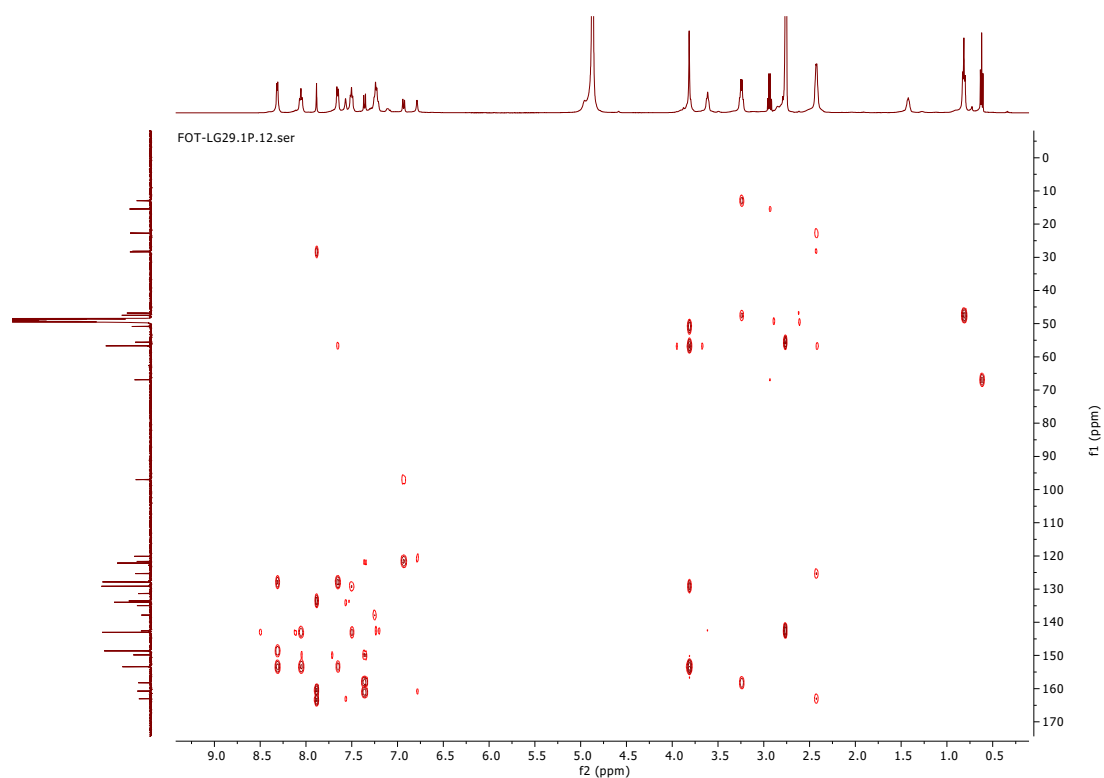

Figure S5.  $^1\text{H}$ - $^{13}\text{C}$  HMBC NMR spectrum of **1**.

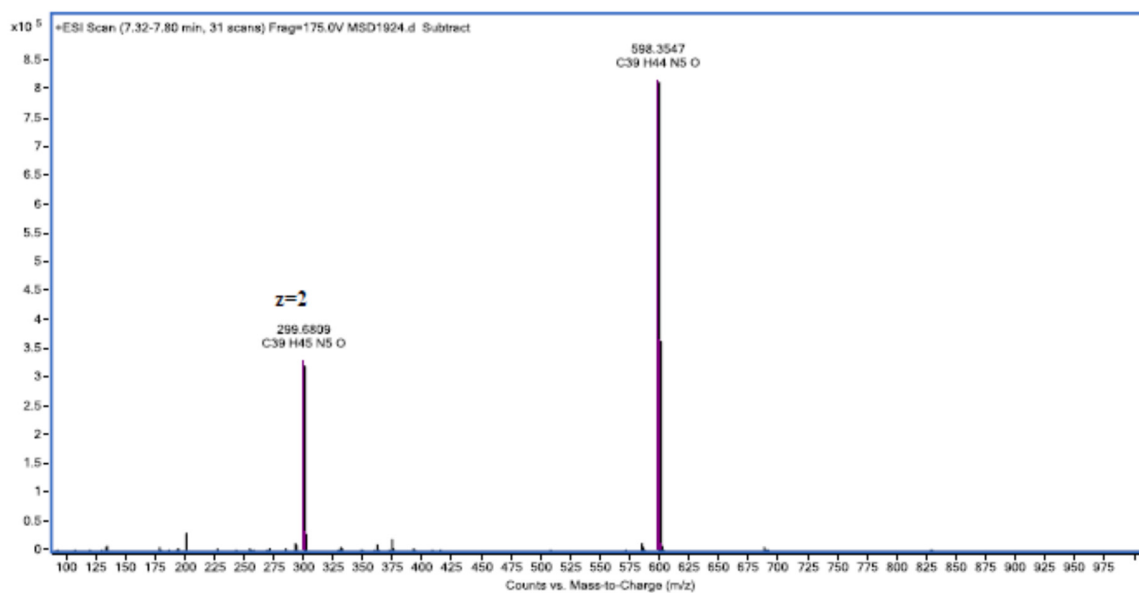

Figure S6. HR-MS spectrum of **1**. Molecular ion was identified at  $m/z$ : 598.3547.

Table S1 – Full NMR peak assignment for chemosensor **1**.

| 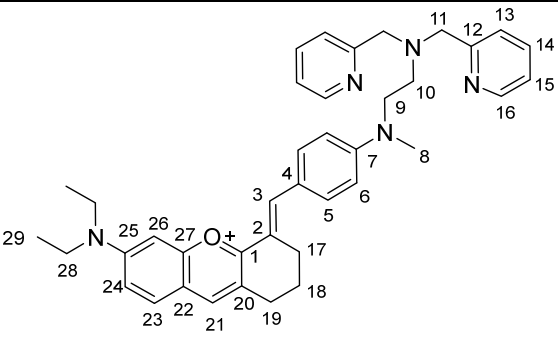 |                |                 |
|------------------------------------------------------------------------------------|----------------|-----------------|
| Position                                                                           | <sup>1</sup> H | <sup>13</sup> C |
| 1                                                                                  | -              | 163.04          |
| 2                                                                                  | -              | 125.33          |
| 3                                                                                  | 6.79           | 97.00           |
| 4                                                                                  | -              | 133.51          |
| 5                                                                                  | 7.23           | 122.14          |
| 6                                                                                  | 7.23           | 133.94          |
| 7                                                                                  | -              | 142.53          |
| 8                                                                                  | 2.77           | 46.82           |
| 9                                                                                  | 3.61           | 55.58           |
| 10                                                                                 | 2.43           | 50.84           |
| 11                                                                                 | 3.82           | 56.69           |
| 12                                                                                 | -              | 153.38          |
| 13                                                                                 | 7.65           | 129.12          |
| 14                                                                                 | 8.06           | 148.64          |
| 15                                                                                 | 7.50           | 127.86          |
| 16                                                                                 | 8.31           | 143.01          |
| 17                                                                                 | 2.43           | 28.17           |
| 18                                                                                 | 1.43           | 22.17           |
| 19                                                                                 | 2.43           | 38.36           |
| 20                                                                                 | -              | 121.64          |
| 21                                                                                 | 7.88           | 149.84          |
| 22                                                                                 | -              | 137.83          |
| 23                                                                                 | 7.36           | 131.35          |
| 24                                                                                 | 6.93           | 120.12          |
| 25                                                                                 | -              | 158.23          |
| 26                                                                                 | 7.57           | 134.97          |
| 27                                                                                 | -              | 160.73          |
| 28                                                                                 | 3.24           | 47.48           |
| 29                                                                                 | 0.82           | 12.97           |

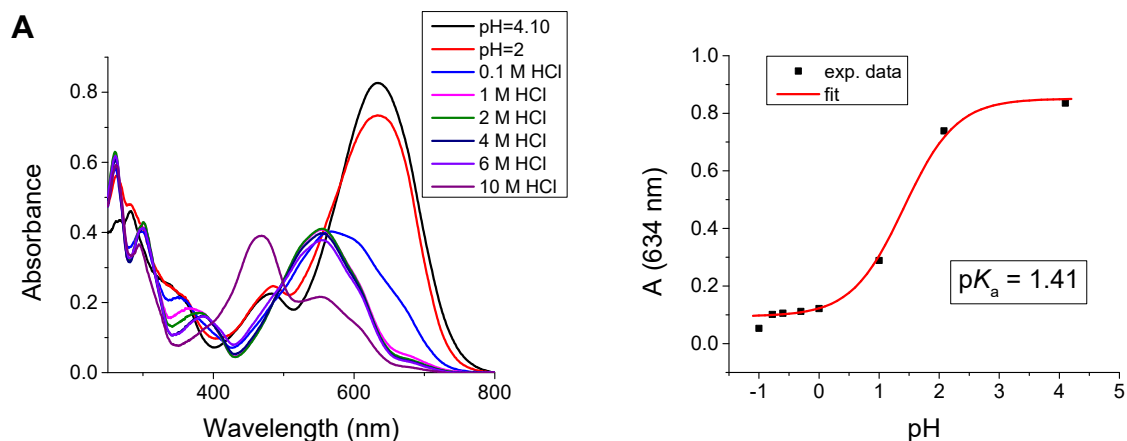

Figure S7. pH titrations of **1** in very acidic conditions: (A) acquired absorption spectra ( $-1.7 < \text{pH} < 4.1$ ); (B) experimental data points collected at 634 nm, with corresponding fit for the pH equilibrium. Experimental conditions:  $[\mathbf{1}] = 3.3 \times 10^{-5} \text{ M}$ , in  $\text{H}_2\text{O}$ .

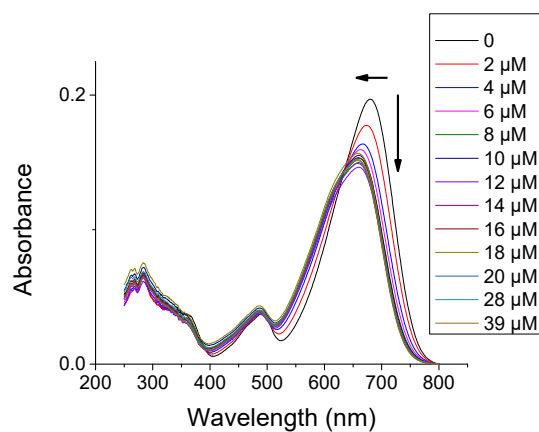

Figure S8. UV-Vis titration of **1** with  $\text{Zn}^{2+}$ . Conditions:  $\text{MeOH}:\text{MOPS}$  10 mM pH7 (50:50).

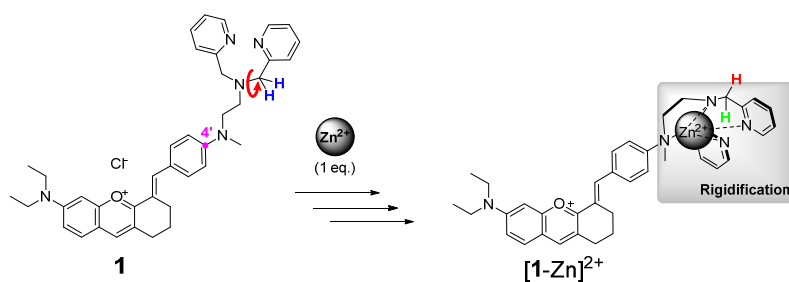

Figure S9. Representation of the structure rigidification of DPA unit upon complexation with  $\text{Zn}^{2+}$  metal. Position 4' of the styrylflavylium is signalled in pink. Equivalent protons (blue) become diastereotopic (red and green).

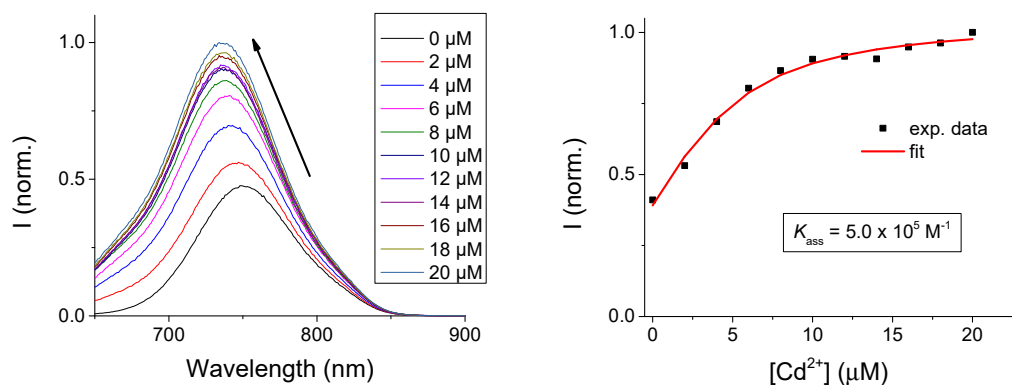

Figure S10. Fluorescence titration of **1** with  $\text{Cd}^{2+}$ . Conditions: MeOH:MOPS 10 mM pH7 (50:50).

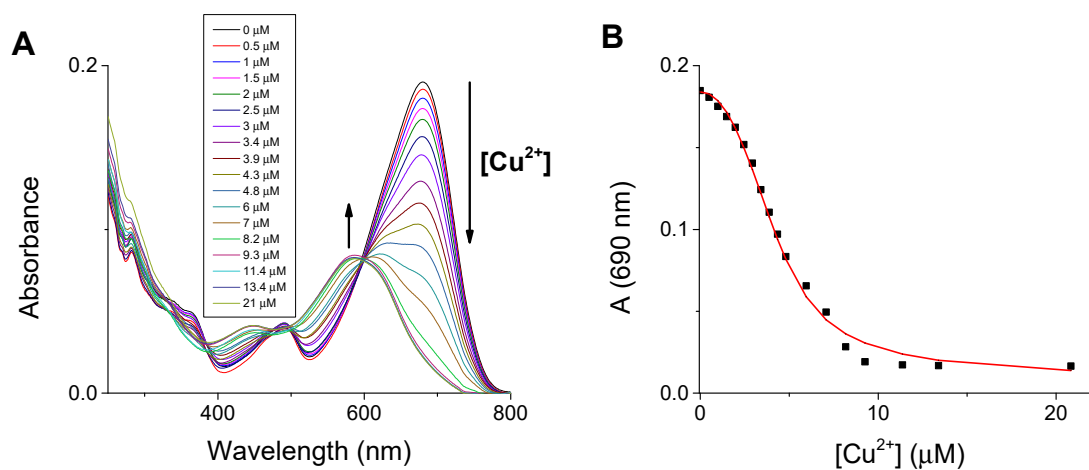

Figure S11. UV-Vis titration of **1** with  $\text{Cu}^{2+}$ : (A) absorption spectra with increasing  $\text{Cu}^{2+}$  concentration; (B) recorded absorbance at 690 nm versus  $\text{Cu}^{2+}$ . Conditions: MeOH:MOPS 10 mM pH7 (50:50).

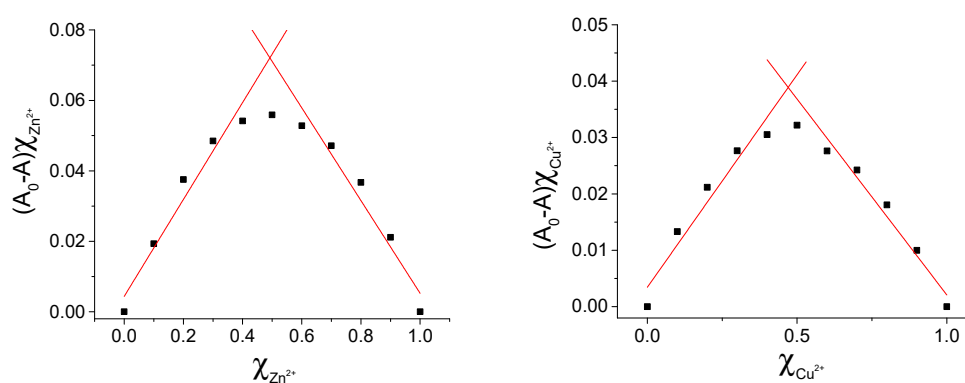

Figure S12. Job's plot of **1** with (A)  $\text{Zn}^{2+}$  and (B)  $\text{Cu}^{2+}$ . Intercept between slopes were achieved at molar fraction of metal of 0.49 ( $\text{Zn}^{2+}$ ) and 0.47 ( $\text{Cu}^{2+}$ ). Conditions: MeOH:MOPS 10 mM pH7 (50:50).

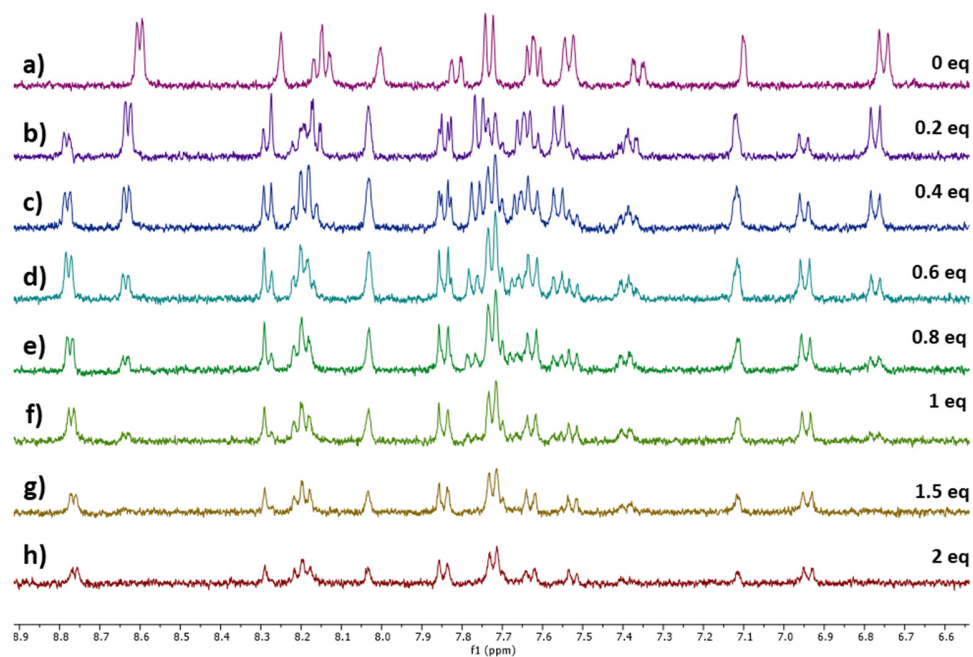

Figure S13.  $^1\text{H}$ -NMR titration (aromatic protons, 8.9 – 6.6 ppm) of **1** (0.78 mM) with  $\text{Zn}^{2+}$ , in a mixture of MeOD:D $_2$ O (1:1) at room temperature, between 0 and 2 equiv. of metal.

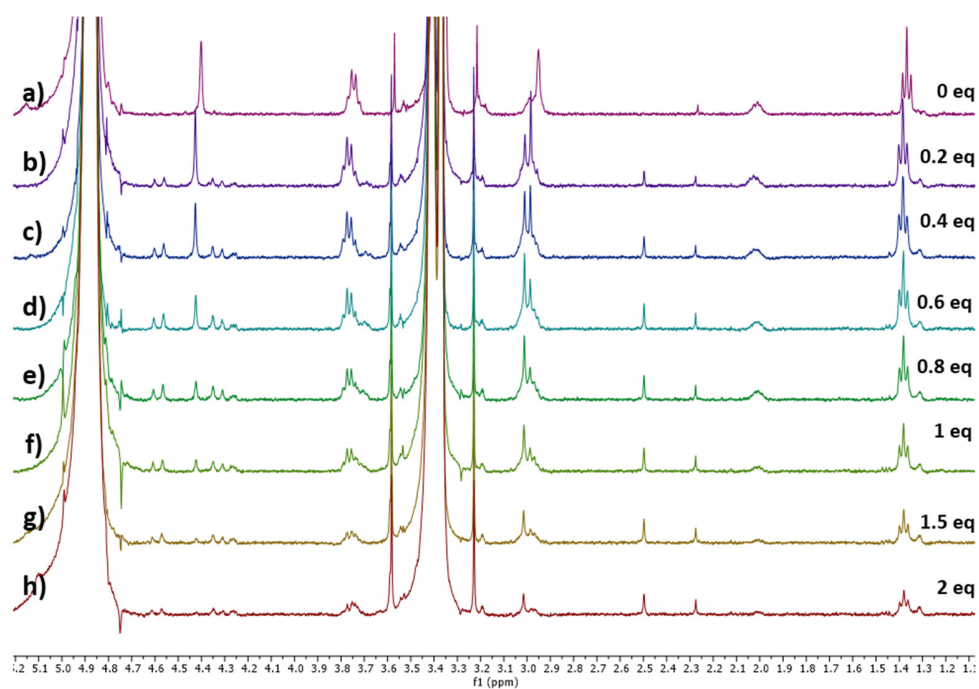

Figure S14.  $^1\text{H}$ -NMR titration (aliphatic protons, 5.1 – 1.2 ppm) of **1** (0.78 mM) with  $\text{Zn}^{2+}$ , in a mixture of MeOD:D $_2$ O (1:1) at room temperature, between 0 and 2 equiv. of metal.



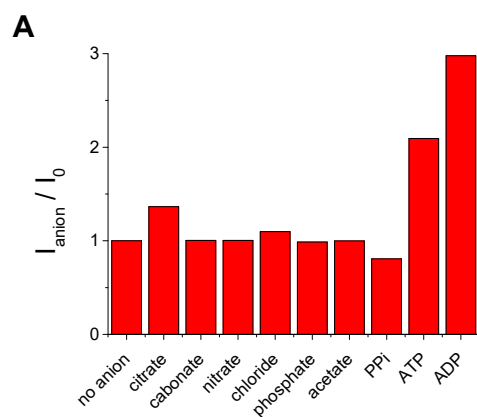

Figure S15. Emission changes of **1**-Zn<sup>2+</sup> in the presence of different anions. Conditions: MeOH:MOPS 10 mM pH7 (50:50).

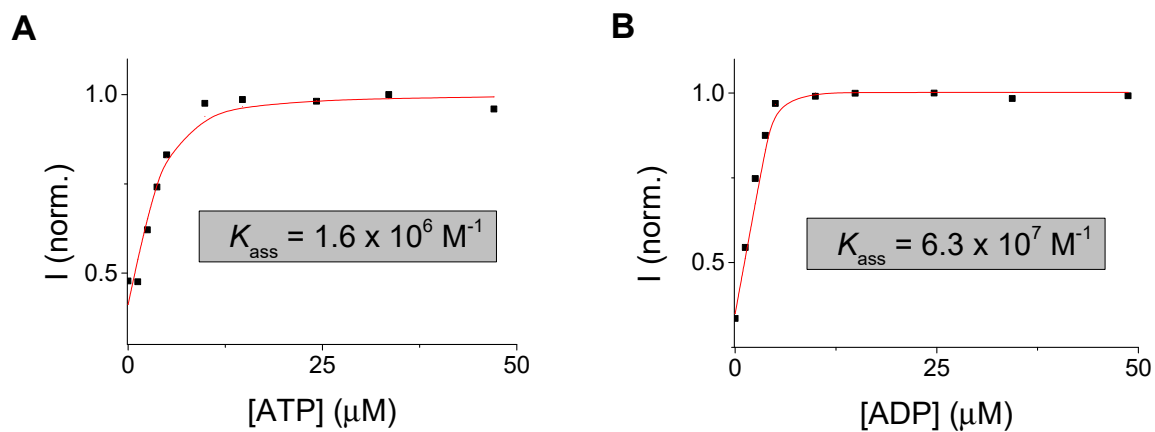

Figure S16. Intensity changes of **1**-Zn<sup>2+</sup> with ATP (A) and ADP (B) concentration (black dots) with the corresponding fitting curve (red line). Conditions: MeOH:MOPS 10 mM pH7 (50:50);  $\lambda_{\text{exc}}$  = 680 nm.

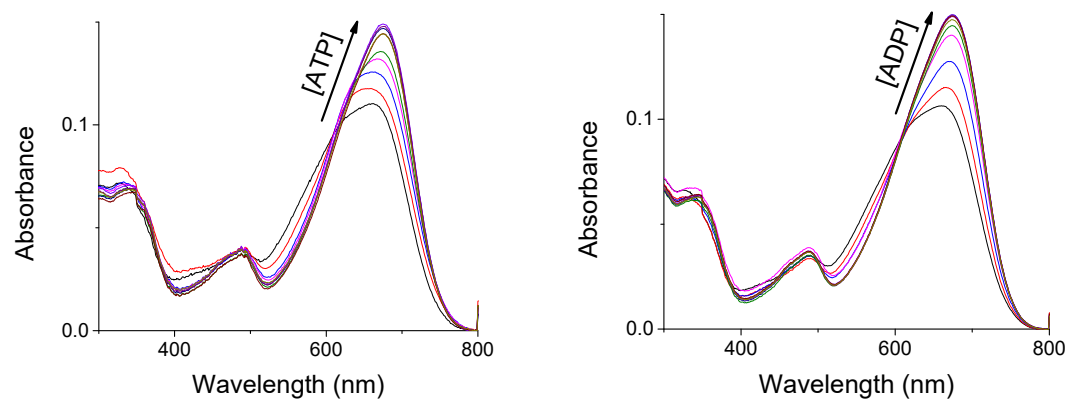

Figure S17. UV-Vis absorption spectra of **1**-Zn<sup>2+</sup> with increasing concentration of (A) ATP and (B) ADP. Conditions: MeOH:MOPS 10 mM pH7 (50:50).

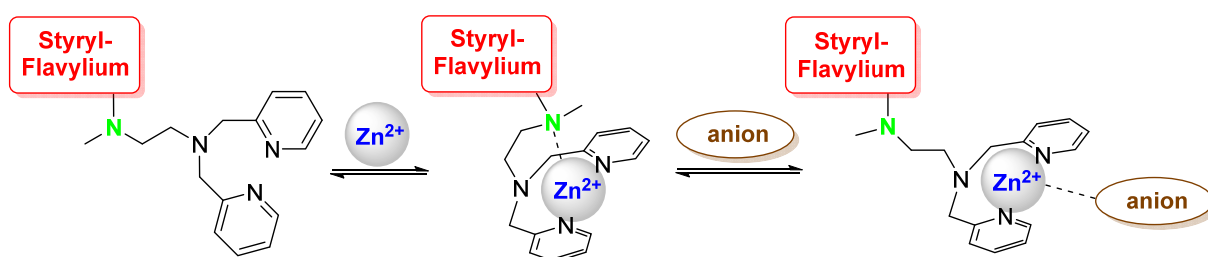

Figure S18. Proposed mechanism for sequential binding of Zn<sup>2+</sup> and anion, with consequent displacement of the 4'-nitrogen from the styryl flavylium (green) upon anion binding.

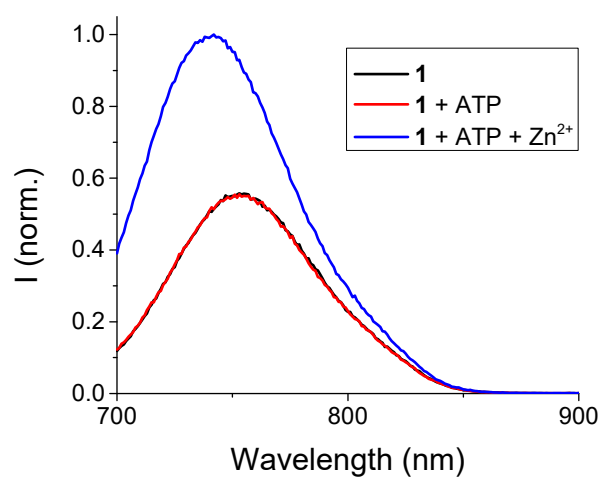

Figure S19. Emission spectra of **1** (black), upon sequential addition of 5 eqs. ATP (red) and 2 eqs.  $\text{Zn}^{2+}$  (blue).

Mathematical deduction of formulae for fitting the experimental data from titration of chemosensor **1** with Cu(II):

The equilibria between chemosensor **1** and Cu<sup>2+</sup> is defined by the generic equations (S1) and (S2)

$$K_1 = \frac{[HG]}{[H][G]} \quad (S1)$$

$$K_2 = \frac{[H_2G]}{[H][HG]} \quad (S2)$$

where:

$H$  = chemosensor **1** (host)

$G$  = Cu<sup>2+</sup> ions (guest)

The mass balance from species comprising H and G are described in equations (S3) and (S4):

$$[H]_o = [H] + [HG] + 2[H_2G] \quad (S3)$$

$$[G]_o = [G] + [HG] + [H_2G] \quad (S4)$$

Combination of these four equations leads a third degree equation (S5):

$$A[H]^3 + B[H]^2 + C[H] + D = 0 \quad (S5)$$

where:

$$A = K_1K_2$$

$$B = 2K_1K_2[G]_o - K_1K_2[H]_o + K_1$$

$$C = K_1[G]_o - K_1[H]_o + 1$$

$$D = -[H]_o$$

with  $[H]_o$  and  $[G]_o$  representing the total concentrations of chemosensor **1** and Cu<sup>2+</sup> in solution, respectively.

The best root for this polynomial was determined using Newton's method, which was latter optimized by the *Solver* Add-In from *Microsoft Excel*, by fitting to the experimental data (UV-Vis absorption or emission intensity).
